# Supplementary material for: Intestinal cancer progression by mutant p53 through the acquisition of invasiveness associated with complex glandular formation
Source: PubMed Central journal article supplement (PMC5658682; doi:10.1038/onc.2017.194), 2017-06-19
Supplement: onc2017194x8.pdf [file onc2017194x8.pdf]

Supplementary Table 1. List of "the mutant p53-activated gene set (MPAGS)".

| Gene ID | Gene Symbol <sup>a</sup> | Entrez ID | Reads per kilobase per million mapped reads (rpkm) |            |            |            |                 |                 | Fold change vs wild type (mean WT) |                      |  |
|---------|--------------------------|-----------|----------------------------------------------------|------------|------------|------------|-----------------|-----------------|------------------------------------|----------------------|--|
|         |                          |           | WT1 <sup>b</sup>                                   | WT2        | p53(M/M)1  | p53(M/M)2  | p53(flox/flox)1 | p53(flox/flox)2 | p53(M/M) vs WT                     | p53(flox/flox) vs WT |  |
| 14955   | H19                      | 14955     | 1.88718081                                         | 1.90717677 | 117.630356 | 139.987034 | 1.630273222     | 2.881873281     | 67.89486357                        | 1.189172715          |  |
| 109294  | Gm1123                   | 382097    | 3.83573752                                         | 3.39673036 | 59.7738474 | 53.8841327 | 7.65095533      | 1.042454123     | 15.71496506                        | 1.201997657          |  |
| 613254  | Tubb4a                   | 22153     | 4.09259583                                         | 4.01926778 | 61.8241888 | 64.9572882 | 1               | 9.60148929      | 15.62914307                        | 1.306911678          |  |
| 11536   | Podn                     | 242608    | 1.44788087                                         | 1.26958404 | 18.2204742 | 17.6276188 | 1.223057278     | 1               | 13.19174091                        | 0.81806292           |  |
| 22269   | 5730457N03Rik            | 70593     | 1                                                  | 1          | 14.0131171 | 10.9544899 | 1               | 1               | 12.48380349                        | 1                    |  |
| 13609   | Rfx4                     | 71137     | 1                                                  | 1          | 12.573222  | 11.6681117 | 1               | 1               | 12.12066688                        | 1                    |  |
| 18053   | Apccdd1                  | 494504    | 23.1540715                                         | 18.5996749 | 244.422892 | 238.362091 | 31.65345337     | 3.842507564     | 11.56267461                        | 0.850126372          |  |
| 380924  | Hmgcs2                   | 15360     | 2.89412754                                         | 2.62146594 | 29.0192032 | 30.0116139 | 1               | 2.865683937     | 10.70253226                        | 0.700864549          |  |
| 22409   | Efcab1                   | 66793     | 1                                                  | 1          | 10.5512923 | 10.530491  | 1               | 1               | 10.54089164                        | 1                    |  |
| 16324   | Oas1a                    | 246730    | 1.00311625                                         | 1.14059699 | 9.85301463 | 12.3855549 | 1               | 3.27725311      | 10.37385464                        | 1.995254324          |  |
| 83410   | Slc30a2                  | 230810    | 18.0570161                                         | 14.4709477 | 163.413855 | 172.480685 | 18.32127499     | 22.88031485     | 10.32633161                        | 1.266651371          |  |
| 65969   | Mt3                      | 17751     | 1.38436008                                         | 1.26817881 | 13.4023121 | 13.008132  | 1               | 1.543913109     | 9.956666123                        | 0.959048374          |  |
| 380712  | Hoxa10                   | 15395     | 1                                                  | 1          | 10.143414  | 9.72258943 | 1               | 1               | 9.933001711                        | 1                    |  |
| 24110   | Ngfr                     | 18053     | 1                                                  | 1          | 10.5616842 | 9.26860232 | 1               | 1               | 9.91514324                         | 1                    |  |
| 18946   | Fam70a                   | 245386    | 1                                                  | 1          | 9.97261393 | 9.28035954 | 1               | 1               | 9.626486736                        | 1                    |  |
| 15395   | Spock2                   | 94214     | 9.66977821                                         | 6.89395891 | 75.8774873 | 79.0233115 | 1               | 10.16167977     | 9.35180254                         | 0.673862407          |  |
| 240638  | Slc16a12                 | 240638    | 1.48462236                                         | 1.3608142  | 14.2949582 | 12.3111156 | 1               | 1               | 9.350436512                        | 0.702879843          |  |
| 1E+08   | Prex2                    | 109294    | 1                                                  | 1          | 9.77917459 | 7.78863224 | 1               | 1               | 8.783903418                        | 1                    |  |
| 18822   | Mira                     | 1.01E+08  | 1                                                  | 1          | 10.0679545 | 7.3784409  | 1               | 1.563284764     | 8.723197712                        | 1.281642382          |  |
| 64706   | Upk2                     | 22269     | 1                                                  | 1          | 8.35958718 | 9.07199472 | 1               | 1.30474828      | 8.715790949                        | 1.15237414           |  |
| 22153   | Htra1                    | 56213     | 2.71436381                                         | 2.81301491 | 26.4004442 | 20.8807409 | 1               | 1.653966025     | 8.55399752                         | 0.480149119          |  |
| 230085  | S1pr1                    | 13609     | 1                                                  | 1          | 8.78311078 | 8.07842138 | 1               | 1               | 8.430766077                        | 1                    |  |
| 18816   | Afp                      | 11576     | 1                                                  | 1          | 8.41933858 | 7.72873607 | 1               | 1               | 8.074037324                        | 1                    |  |
| 72190   | Atp10a                   | 11982     | 1.9454736                                          | 1.99996423 | 17.619394  | 14.0229327 | 1               | 2.405605714     | 8.019978545                        | 0.863175612          |  |
| 26971   | Pcdh7                    | 54216     | 1.33031952                                         | 1.21308183 | 10.4024323 | 9.77555627 | 1               | 1               | 7.933466189                        | 0.786348564          |  |
| 18616   | Vdr                      | 22337     | 3.43093097                                         | 3.58538936 | 26.5306622 | 27.7585692 | 5.749309114     | 2.871294478     | 7.737565108                        | 1.22865023           |  |
| 56811   | Tie6                     | 114606    | 1.60588584                                         | 1.45952225 | 12.1935576 | 11.1320239 | 1.259503246     | 1.600834983     | 7.609290753                        | 0.933101938          |  |
| 13601   | Cubn                     | 65969     | 1.20819222                                         | 1.39317713 | 10.3031387 | 9.06857268 | 3.754908103     | 1               | 7.446736232                        | 1.827848128          |  |
| 93897   | Pla2g2f                  | 26971     | 14.7764489                                         | 13.2109591 | 102.679616 | 104.816316 | 14.845556813    | 8.786722915     | 7.41390315                         | 0.844390128          |  |
| 101602  | 9330117O12               | 328957    | 1                                                  | 1          | 7.71459275 | 6.91865499 | 1               | 1               | 7.31662387                         | 1                    |  |
| 70571   | Usp18                    | 24110     | 1.14147997                                         | 1.55304489 | 11.0017003 | 8.66813847 | 1               | 1               | 7.299928485                        | 0.74224589           |  |
| 50934   | Tcerg1l                  | 70571     | 1                                                  | 1          | 7.92310214 | 6.64851436 | 1               | 1               | 7.285808248                        | 1                    |  |
| 20840   | Lrrm1                    | 16979     | 1                                                  | 1          | 7.67885178 | 6.82557128 | 1               | 1               | 7.252211527                        | 1                    |  |
| 22270   | Otop1                    | 21906     | 1                                                  | 1          | 7.35580431 | 7.09295699 | 1               | 1               | 7.224380652                        | 1                    |  |
| 17751   | Dlx3                     | 13393     | 2.10017464                                         | 2.22710534 | 14.938644  | 15.655867  | 1.186801553     | 1               | 7.070147787                        | 0.505352453          |  |
| 382097  | 2510009E07Rik            | 72190     | 4.06718721                                         | 3.66639774 | 29.4534045 | 24.9932637 | 1               | 1.905654        | 7.040288375                        | 0.375718896          |  |
| 21380   | Gata2                    | 14461     | 1                                                  | 1          | 6.85580607 | 7.20584141 | 1               | 1.983907374     | 7.030823737                        | 1.491953687          |  |
| 73916   | Lmo2                     | 16909     | 1                                                  | 1          | 7.10218431 | 6.92041953 | 1               | 1               | 7.01130192                         | 1                    |  |
| 665927  | Cxcl5                    | 20311     | 1                                                  | 1          | 7.14290533 | 6.80040185 | 1               | 2.526455029     | 6.971653587                        | 1.763227514          |  |
| 12405   | Tmem59l                  | 67937     | 1                                                  | 1          | 6.86739049 | 6.67868097 | 1               | 1               | 6.772125731                        | 1                    |  |
| 245297  | Gm15308                  | 1E+08     | 1                                                  | 1          | 8.15199801 | 5.36435048 | 1.351008058     | 1               | 6.758174249                        | 1.175504029          |  |
| 13393   | Fzd10                    | 93897     | 2.88072092                                         | 2.66158972 | 18.8738783 | 18.2753648 | 2.820139249     | 1.159064643     | 6.702843907                        | 0.717968398          |  |
| 70593   | Nptx1                    | 18164     | 3.31436433                                         | 3.2542762  | 21.189495  | 21.4579091 | 1               | 1.530665636     | 6.492576955                        | 0.385264748          |  |
| 67086   | N28178                   | 230085    | 1                                                  | 1          | 7.0705792  | 5.90980693 | 1               | 1               | 6.490193064                        | 1                    |  |
| 69047   | Rnf152                   | 320311    | 1.43422031                                         | 1.22747803 | 9.40810655 | 7.84642075 | 1               | 1               | 6.482525492                        | 0.751399952          |  |
| 320311  | Trim62                   | 67525     | 1.50381091                                         | 1.54009104 | 10.0082012 | 9.64186948 | 1               | 1.360295184     | 6.45553116                         | 0.775417613          |  |
| 12560   | Ism1                     | 319909    | 1.1712029                                          | 1.1719861  | 8.85178862 | 6.26699786 | 1               | 1               | 6.452226636                        | 0.853537636          |  |
| 230810  | Dkk2                     | 56811     | 1.93842424                                         | 2.65580606 | 15.1654395 | 14.4156821 | 1               | 1               | 6.438754623                        | 0.435328634          |  |
| 11551   | Cstf2t                   | 83410     | 1.83190501                                         | 1.86390543 | 11.6871901 | 11.5289642 | 1               | 5.487647071     | 6.281749201                        | 1.755405797          |  |
| 244654  | Morn4                    | 226123    | 1.20518385                                         | 1.19853223 | 7.53760608 | 7.54949268 | 1               | 3.052500222     | 6.276572714                        | 1.68593132           |  |
| 50795   | Serpinf2                 | 18816     | 1                                                  | 1          | 5.41519616 | 7.1037982  | 1               | 1               | 6.259497184                        | 1                    |  |
| 71137   | Zim1                     | 22776     | 2.627829                                           | 2.80920654 | 17.9580202 | 15.6471218 | 1               | 1               | 6.180783938                        | 0.367847512          |  |
| 17380   | Sema3e                   | 20349     | 1                                                  | 1          | 6.40161671 | 5.88573587 | 1.430292982     | 1               | 6.143676289                        | 1.215146491          |  |
| 1E+08   | Scube1                   | 64706     | 2.179316                                           | 2.07177697 | 12.8696356 | 13.055652  | 1               | 1               | 6.098499329                        | 0.470467246          |  |
| 627821  | Cdh3                     | 12560     | 1                                                  | 1          | 6.35840979 | 5.80959986 | 1               | 1.205385454     | 6.084004826                        | 1.102692727          |  |
| 21413   | Lbp                      | 16803     | 1.14452613                                         | 1          | 7.31428479 | 5.73266629 | 1               | 1               | 6.083838709                        | 0.932606963          |  |
| 218203  | Pbipf1                   | 228801    | 1                                                  | 1          | 6.36680686 | 5.75062595 | 1               | 1               | 6.058716404                        | 1                    |  |
| 1E+08   | Pbipf5                   | 228802    | 7.27510666                                         | 9.00338741 | 47.6509906 | 50.7734715 | 1               | 1.896325433     | 6.046287921                        | 0.177923426          |  |
| 18106   | Slc7a8                   | 50934     | 1                                                  | 1          | 6.72743478 | 5.27542454 | 1               | 1               | 6.001429662                        | 1                    |  |
| 103142  | Stac                     | 20840     | 1                                                  | 1          | 5.59994283 | 6.30530824 | 1.376255625     | 1               | 5.952625538                        | 1.188127812          |  |
| 11576   | Upk3a                    | 22270     | 6.77252869                                         | 6.149621   | 33.1303146 | 43.4536723 | 3.856053585     | 2.788057084     | 5.926567079                        | 0.514164503          |  |
| 229521  | Hoxa9                    | 15405     | 1                                                  | 1          | 6.41686219 | 5.23476401 | 1               | 1               | 5.8258131                          | 1                    |  |
| 11303   | Evx1                     | 14028     | 1                                                  | 1          | 6.09822339 | 5.52724897 | 1               | 1               | 5.812736182                        | 1                    |  |
| 242484  | Cacna1a                  | 12286     | 1.00302541                                         | 1          | 5.31995189 | 6.20210951 | 1               | 1               | 5.752329118                        | 0.998489579          |  |
| 72090   | Ift57                    | 73916     | 1.09749055                                         | 1.16687704 | 6.58084435 | 6.39932616 | 2.457745445     | 1.928851398     | 5.732360144                        | 1.937228243          |  |
| 228801  | Dennd2a                  | 209773    | 1.2445494                                          | 1.39513529 | 7.68656486 | 7.23195449 | 1               | 1               | 5.651629304                        | 0.757666249          |  |
| 18761   | Prss56                   | 69453     | 1                                                  | 1          | 4.71796724 | 6.56820839 | 1               | 1               | 5.643087813                        | 1                    |  |
| 22041   | 5930412G12Rik            | 319616    | 1                                                  | 1          | 5.66836555 | 5.6159224  | 1               | 1               | 5.642143974                        | 1                    |  |
| 12159   | Plod1                    | 18822     | 1.06951809                                         | 1.09552861 | 5.61798199 | 6.32914403 | 1.132758259     | 1.607837428     | 5.518183977                        | 1.265836752          |  |
| 170776  | Cbln2                    | 12405     | 1                                                  | 1          | 6.29295445 | 4.56346827 | 1               | 1               | 5.428211359                        | 1                    |  |
| 225266  | 4921525O09Rik            | 74050     | 1                                                  | 1          | 5.89824807 | 4.9197377  | 1               | 1               | 5.408992885                        | 1                    |  |
| 20198   | Comp                     | 12845     | 1                                                  | 1          | 5.28279051 | 5.45036104 | 1               | 1               | 5.366575775                        | 1                    |  |
| 232664  | 4933436C20Rik            | 71296     | 1.07853127                                         | 1.08064318 | 5.55534766 | 5.95360456 | 2.519418347     | 1               | 5.33025585                         | 1.629983327          |  |
| 15160   | Tcf4                     | 21413     | 6.89282554                                         | 6.53818183 | 37.9285049 | 33.3344727 | 9.736544158     | 5.750830435     | 5.305855002                        | 1.153105956          |  |
| 53412   | 1700020N18Rik            | 67086     | 1                                                  | 1          | 4.99999066 | 5.5652648  | 1               | 1               | 5.278258568                        | 1                    |  |
| 12845   | Esyt3                    | 272636    | 1.17983043                                         | 1.42915738 | 7.49339707 | 6.16925295 | 1               | 1.048591256     | 5.23676267                         | 0.785205374          |  |
| 15007   | Svopl                    | 320590    | 1                                                  | 1          | 5.38565382 | 5.05006445 | 1               | 1               | 5.217859137                        | 1                    |  |
| 30939   | Irx5                     | 54352     | 3.8963876                                          | 3.98387201 | 18.868973  | 21.9697873 | 8.290878054     | 1               | 5.182413064                        | 1.179006595          |  |
| 69354   | Peg3                     | 18616     | 32.1555665                                         | 34.2242732 | 182.17052  | 158.01857  | 1               | 3.660130784     | 5.124885678                        | 0.07204008           |  |
| 192201  | Nxpe4                    | 244853    | 1                                                  | 1          | 5.22500095 | 4.99822033 | 2.380128558     | 1               | 5.111610642                        | 1.690064279          |  |
| 194126  | Pik3ap1                  | 83490     | 1.341897                                           | 1.21621668 | 6.30715986 | 6.70770667 | 1               | 1.74695446      | 5.087681062                        | 1.073820323          |  |
| 23960   | Mylip                    | 218203    | 1                                                  | 1          | 5.18291452 | 4.80292407 | 1               | 1.005262494     | 4.992919293                        | 1.002631247          |  |
| 14461   | Agmat                    | 75986     | 1.54762029                                         | 2.11086542 | 9.03969627 | 9.20930829 | 1               | 1               | 4.988130613                        | 0.546674269          |  |
| 211135  | Cd244                    | 18106     | 1.36293817                                         | 1.26096271 | 7.3473281  | 5.73675657 | 1.147693754     | 1.860421284     | 4.98650111                         | 1.146428608          |  |
| 320590  | Vim                      | 22352     | 68.9606276                                         | 49.9526219 | 306.032487 | 284.012969 | 71.57029395     | 19.83942076     | 4.961982437                        | 0.768709248          |  |
| 19662   | Syt11                    | 229521    | 2.38156149                                         | 2.04346764 | 11.9457175 | 10.0072634 | 1.350090137     | 2.636022163     | 4.96109295                         | 0.900810407          |  |

|        |               |          |            |            |            |            |             |   |   |             |             |             |
|--------|---------------|----------|------------|------------|------------|------------|-------------|---|---|-------------|-------------|-------------|
| 15405  | Mt4           | 17752    | 1.5238582  | 1.41778192 | 6.2433563  | 7.88611255 |             | 1 | 1 | 4.803262215 | 0.679892821 |             |
| 94214  | Abca1         | 11303    | 3.05583998 | 2.96995197 | 16.1748116 | 12.7045133 |             | 1 | 1 | 1.169082766 | 4.792618972 | 0.359966421 |
| 83490  | D630039A03Rik | 242484   | 10.9263634 | 10.9403971 | 55.0349657 | 49.2895874 | 9.383700711 |   |   | 7.248233841 | 4.770919464 | 0.760603501 |
| 382059 | Gm15340       | 1E+08    | 1          | 1          | 4.84112149 | 4.6507842  |             | 1 | 1 | 4.745952847 |             | 1           |
| 23966  | Prkcq         | 18761    | 3.28167371 | 3.53956409 | 17.3796365 | 14.8954056 | 4.572492489 |   |   | 2.160541586 | 4.731552099 | 0.987069249 |
| 72709  | Trf           | 22041    | 2.04741875 | 2.13212571 | 9.73365338 | 10.0100391 |             | 1 | 1 | 3.549045327 | 4.723886216 | 1.088406972 |
| 12552  | Sp6           | 83395    | 1.03462636 | 1.12401068 | 5.34056952 | 4.78878146 |             | 1 | 1 | 4.692475277 | 0.92651055  |             |
| 12577  | Gm6792        | 627821   | 1          | 1          | 5.54466616 | 3.79653577 |             | 1 | 1 | 4.670600965 |             | 1           |
| 320343 | Rbp4          | 19662    | 1          | 1          | 4.37426311 | 4.95854793 |             | 1 | 1 | 2.865610046 | 4.666405517 | 1.932805023 |
| 73713  | Klhl14        | 225266   | 1          | 1          | 4.7732371  | 4.47840903 |             | 1 | 1 | 4.625823062 |             | 1           |
| 65255  | S100a4        | 20198    | 2.00429005 | 2.47822246 | 11.7319604 | 8.9598303  | 3.303065778 |   |   | 2.158311204 | 4.616148505 | 1.218374064 |
| 54352  | Ppp1r3c       | 53412    | 1.57449889 | 1.2270081  | 7.22189628 | 5.65434456 |             | 1 | 1 | 4.596183732 | 0.713901486 |             |
| 52808  | H2-Q10        | 15007    | 4.36282166 | 4.08910866 | 17.7849498 | 21.0222473 | 8.657956188 |   |   | 7.62698467  | 4.591518827 | 1.926771785 |
| 15016  | Inhbb         | 16324    | 1          | 1          | 4.77563707 | 4.39460379 |             | 1 | 1 | 4.585120427 |             | 1           |
| 16832  | Otc           | 18416    | 1.17437029 | 1.38376378 | 6.12214409 | 5.57513987 | 2.519645205 |   |   | 4.572584421 | 1.375864251 |             |
| 21983  | Tmod2         | 50876    | 1          | 1          | 5.08746759 | 4.05015185 |             | 1 | 1 | 1.101621148 | 4.568809724 | 1.050810574 |
| 22337  | Glul          | 14645    | 71.869712  | 76.5320426 | 347.748143 | 323.730167 | 19.74380985 |   |   | 40.61831536 | 4.524732956 | 0.406748056 |
| 16842  | Cdh11         | 12552    | 1          | 1          | 4.64852366 | 4.37387139 |             | 1 | 1 | 4.511197527 |             | 1           |
| 16841  | Mme           | 17380    | 1          | 1          | 4.59422782 | 4.39523133 |             | 1 | 1 | 2.268440785 | 4.494729577 | 1.634220392 |
| 14028  | Dkk3          | 50781    | 12.0892094 | 11.5425102 | 52.1774054 | 52.8959001 | 1.466418366 |   |   | 13.48590561 | 4.446282671 | 0.632722638 |
| 235604 | Gpx3          | 14778    | 1          | 1          | 4.69349265 | 4.18136968 |             | 1 | 1 | 1.169332744 | 4.437431166 | 1.084666372 |
| 18416  | Rdh9          | 103142   | 7.43526262 | 6.67785608 | 30.9446264 | 31.6166915 | 7.012568703 |   |   | 5.021960217 | 4.432848562 | 0.852719316 |
| 15360  | Wif1          | 24117    | 15.4560643 | 16.4557103 | 71.3608354 | 69.878106  | 1.6569049   |   |   | 7.40671487  | 4.42591936  | 0.284021176 |
| 213391 | Oas1g         | 23960    | 1          | 1          | 3.82761812 | 4.94116181 |             | 1 | 1 | 1.173095707 | 4.384389963 | 1.086547853 |
| 30045  | Sox18         | 20672    | 1          | 1          | 4.0766856  | 4.63894455 |             | 1 | 1 | 4.357815075 |             | 1           |
| 1E+08  | Sox11         | 20666    | 1          | 1          | 4.57361079 | 4.12166543 |             | 1 | 1 | 4.34763811  |             | 1           |
| 327987 | Tenm4         | 23966    | 1.18373954 | 1          | 4.94115119 | 4.53493603 |             | 1 | 1 | 2.15550155  | 4.339385278 | 1.444999044 |
| 67701  | Defa22        | 382059   | 11.6422105 | 9.49629663 | 46.6630434 | 44.7929693 | 3.228931197 |   |   | 3.208798507 | 4.326512383 | 0.304549875 |
| 246730 | Tbx1          | 21380    | 3.65263096 | 4.18732065 | 17.1039106 | 16.5359554 |             | 1 | 1 | 1.251816034 | 4.290825701 | 0.287223206 |
| 22379  | Cdkn1c        | 12577    | 6.41609276 | 4.87424612 | 23.530918  | 24.7615496 | 5.694010684 |   |   | 9.789391595 | 4.277326674 | 1.371385079 |
| 19085  | Cps1          | 227231   | 1.0689553  | 1          | 3.81050709 | 4.97032331 |             | 1 | 1 | 4.24408898  | 0.966671439 |             |
| 22419  | Rbm20         | 73713    | 1          | 1          | 4.46219945 | 4.02347202 |             | 1 | 1 | 4.242835735 |             | 1           |
| 16543  | Serpind1      | 15160    | 1          | 1          | 4.9070154  | 3.48289505 |             | 1 | 1 | 4.194955225 |             | 1           |
| 108176 | H2-Q5         | 15016    | 1.29512298 | 1.83234263 | 5.53299185 | 7.5463902  |             | 1 | 1 | 2.454495973 | 4.182102594 | 1.104567212 |
| 23882  | Scn2b         | 72821    | 3.23679591 | 2.71695713 | 11.8329395 | 13.0458948 | 7.055197649 |   |   | 1.676245664 | 4.178680941 | 1.466544424 |
| 68521  | Ubxn10        | 212190   | 1.04263985 | 1          | 3.91602561 | 4.61265375 |             | 1 | 1 | 1.408860335 | 4.17532212  | 1.179287838 |
| 52589  | Lef1          | 16842    | 1.51787876 | 1.29595758 | 5.93274428 | 5.71079343 |             | 1 | 1 | 4.137958392 | 0.710773391 |             |
| 24117  | Eml1          | 68519    | 2.19298873 | 2.27896363 | 9.45427612 | 9.04317887 |             | 1 | 1 | 2.708837593 | 4.136326484 | 0.829355345 |
| 27273  | Fgf3          | 14174    | 1          | 1          | 3.46431952 | 4.75912451 |             | 1 | 1 | 4.111722018 |             | 1           |
| 1E+08  | Maf           | 17132    | 2.16147957 | 2.98219666 | 11.2381979 | 9.68922987 |             | 1 | 1 | 4.068574066 | 0.388826961 |             |
| 15958  | Prkar1b       | 19085    | 2.29388203 | 2.47733333 | 9.34635542 | 10.0207779 |             | 1 | 1 | 1.244881397 | 4.059161413 | 0.470505149 |
| 68616  | Bmp4          | 12159    | 4.21536571 | 3.98303401 | 17.6155791 | 15.6018089 |             | 1 | 1 | 4.051691685 | 0.243950047 |             |
| 66298  | Dnajc12       | 30045    | 3.41408813 | 2.65539485 | 12.3365792 | 12.0208558 | 2.807424646 |   |   | 3.790337198 | 4.013098817 | 1.087038529 |
| 26382  | D130040H23Rik | 211135   | 1          | 1          | 4.18119057 | 3.83398502 |             | 1 | 1 | 1.994937433 | 4.007587795 | 1.497468716 |
| 277692 | Isg15         | 1E+08    | 1          | 1          | 4.98308195 | 4.67589619 | 1.362624073 |   |   | 2.178799438 | 3.988202846 | 1.462257718 |
| 224405 | C1qtnf6       | 72709    | 1.54753217 | 1.57143256 | 6.14728682 | 6.28849594 |             | 1 | 1 | 2.41234609  | 3.987150812 | 1.094063699 |
| 625286 | Reg4          | 67709    | 28.2616345 | 22.1148017 | 97.5637969 | 101.926615 | 31.06575044 |   |   | 35.89578144 | 3.959994526 | 1.329232383 |
| 54612  | Npl           | 74091    | 2.98794108 | 3.13056379 | 13.3009981 | 10.7295629 |             | 1 | 1 | 3.927521749 | 0.326877242 |             |
| 22420  | Wnt5b         | 22419    | 1          | 1          | 3.73264964 | 4.1027419  |             | 1 | 1 | 3.917695774 |             | 1           |
| 218952 | Gm14446       | 667373   | 1.05013668 | 1          | 4.01179031 | 4.01849002 | 2.252378524 |   |   | 1.553321001 | 3.916948753 | 1.856315022 |
| 21808  | Mdfic         | 16543    | 1.02642334 | 1.30086577 | 4.95315133 | 4.15097315 | 3.307121386 |   |   | 1.161956548 | 3.911900966 | 1.920293415 |
| 212943 | Tceal8        | 66684    | 2.84404856 | 3.24611363 | 12.5849563 | 11.1936761 |             | 1 | 1 | 9.609494892 | 3.904433351 | 1.742070993 |
| 383619 | Asprv1        | 67855    | 1.33431791 | 2.15858604 | 6.24505596 | 7.33679869 |             | 1 | 1 | 3.393159859 | 3.888413433 | 1.257738523 |
| 16981  | Pdk4          | 27273    | 9.76883824 | 10.1512213 | 42.2554928 | 35.164383  |             | 1 | 1 | 2.323974599 | 3.886499986 | 0.166865696 |
| 74091  | Camkv         | 235604   | 1.2072196  | 1          | 3.86389824 | 4.6248815  |             | 1 | 1 | 3.845915355 | 0.906117363 |             |
| 242608 | Tpsb2         | 17229    | 4.19235242 | 6.11712518 | 22.8419672 | 16.4044191 |             | 1 | 1 | 1.203392024 | 3.806825893 | 0.213724896 |
| 16803  | Ecm1          | 13601    | 3.0415586  | 3.60197733 | 12.7320939 | 12.5332494 |             | 1 | 1 | 2.375262236 | 3.802996424 | 0.508052078 |
| 319616 | Dgka          | 13139    | 8.10697559 | 9.87251326 | 36.1289069 | 31.7604952 | 1.9042834   |   |   | 8.062672377 | 3.775936157 | 0.554351453 |
| 207683 | Upb1          | 103149   | 1.49772727 | 2.1835768  | 5.13999623 | 5.08027925 |             | 1 | 1 | 1.633486294 | 3.762870324 | 0.969589073 |
| 218772 | Gm7849        | 665927   | 1          | 1          | 3.1970191  | 4.1861375  | 1.980189583 |   |   | 1.117453455 | 3.752919703 | 1.548821519 |
| 15957  | Itgb5         | 16419    | 4.041436   | 4.50884245 | 15.078526  | 16.9225843 | 2.976683225 |   |   | 5.778078483 | 3.742698032 | 1.023915392 |
| 16979  | Gpcpd1        | 74182    | 12.9225824 | 13.2136671 | 51.5032297 | 45.5093318 | 3.542714484 |   |   | 6.324641913 | 3.711801167 | 0.377535284 |
| 71951  | Igslf11       | 207683   | 2.23211197 | 2.26210297 | 8.54445693 | 8.07532431 | 2.161731885 |   |   | 2.816091479 | 3.698038805 | 1.107606875 |
| 332397 | Col9a3        | 12841    | 1          | 1          | 2.53039446 | 4.84430332 |             | 1 | 1 | 3.687348887 |             | 1           |
| 14645  | Arl4a         | 11861    | 4.97846435 | 5.14308501 | 19.4151911 | 17.7793293 | 3.962435084 |   |   | 3.365444814 | 3.674785261 | 0.723987962 |
| 21906  | Asb4          | 65255    | 8.11911512 | 7.65085881 | 30.1224352 | 27.7603394 |             | 1 | 1 | 4.911351914 | 3.670441993 | 0.374848553 |
| 14159  | Tle2          | 21886    | 1          | 1          | 3.28706389 | 4.04938692 |             | 1 | 1 | 3.668225408 |             | 1           |
| 68519  | Mtss1l        | 244654   | 1.40529633 | 1.04110205 | 4.5467529  | 4.42113259 |             | 1 | 1 | 3.665750249 | 0.817528336 |             |
| 494504 | Defa21        | 66298    | 25.7844971 | 20.3965466 | 88.8304873 | 79.7596625 | 6.609135619 |   |   | 3.774819864 | 3.650635336 | 0.224853201 |
| 12286  | 4933406C10Rik | 74076    | 2.13412459 | 1.77408946 | 7.26203911 | 6.79075508 |             | 1 | 1 | 3.595707407 | 0.511742698 |             |
| 16909  | Nanos1        | 332397   | 4.35559858 | 5.54743478 | 19.9332272 | 15.531734  | 2.077071817 |   |   | 1.913916209 | 3.581222031 | 0.403006622 |
| 330256 | Fes           | 14159    | 1.21068847 | 1          | 3.43021214 | 4.41506323 |             | 1 | 1 | 3.308068939 | 3.548792824 | 1.948745381 |
| 17132  | Nuak1         | 77976    | 1.24251079 | 1.26618885 | 4.6710999  | 4.17408708 |             | 1 | 1 | 3.525805494 | 0.797225768 |             |
| 83767  | Ifit1         | 15957    | 1.21805085 | 1.12344766 | 3.76149872 | 4.49178695 |             | 1 | 1 | 1.400901674 | 3.524787929 | 1.025369723 |
| 16552  | Lypd6b        | 71897    | 1.41581454 | 1.63291916 | 5.46039531 | 5.23389797 |             | 1 | 1 | 3.507782023 | 0.656010067 |             |
| 54396  | Stx1a         | 20907    | 4.10102063 | 3.33330262 | 11.7316717 | 14.2773646 | 4.773572266 |   |   | 4.057832459 | 3.498507594 | 1.187923155 |
| 234912 | Vash2         | 226841   | 2.54864194 | 2.48832857 | 8.83630735 | 8.66140699 | 4.371350319 |   |   | 3.316318339 | 3.473856816 | 1.526248495 |
| 22776  | Adra2a        | 11551    | 2.76002072 | 1.83987704 | 5.75010127 | 8.38459965 |             | 1 | 1 | 1.050045963 | 3.468490335 | 0.445672071 |
| 22354  | 6430573F11Rik | 319582   | 3.31208776 | 3.03409824 | 10.7993008 | 10.8505916 | 5.804186593 |   |   | 2.819161642 | 3.114180908 | 1.358823746 |
| 66684  | Gsdma         | 57911    | 7.67043289 | 6.55436811 | 24.6065757 | 23.4424069 | 5.058127839 |   |   | 6.422036212 | 3.377831625 | 0.8070527   |
| 108899 | Stxbp4        | 20913    | 1.36835551 | 1.37317456 | 4.76482425 | 4.4144044  | 1.937365425 |   |   | 2.004888076 | 3.348213748 | 1.43797566  |
| 226123 | Pdgfrl        | 68797    | 3.37443345 | 2.91528555 | 10.7493551 | 10.1748738 |             | 1 | 1 | 1.578693892 | 3.326735093 | 0.409985548 |
| 14724  | Gm20362       | 1.01E+08 | 1.5063007  | 1.24047757 | 3.9502586  | 5.08619403 |             |   |   |             |             |             |

|         |               |          |            |            |             |             |               |             |              |              |
|---------|---------------|----------|------------|------------|-------------|-------------|---------------|-------------|--------------|--------------|
| 109624  | Igtp          | 16145    | 1.60883341 | 1.47265528 | 5.2501513   | 4.58443582  | 1             | 1           | 3.191505181  | 0.649036943  |
| 68312   | Fmnl3         | 22379    | 2.03191394 | 2.13260947 | 6.47072157  | 6.75380207  | 1.836454688   | 3.640139148 | 3.1755191    | 1.315058962  |
| 50781   | Ifi2711       | 52668    | 6.80259029 | 6.80048198 | 19.5864659  | 23.5238876  | 5.078491406   | 3.483118365 | 3.169163015  | 0.62938795   |
| 22361   | Kif19a        | 286942   | 1.35128202 | 1          | 2.84433759  | 4.47867258  | 1             | 2.103762436 | 3.114475385  | 1.320029846  |
| 224344  | Hr            | 15460    | 2.11592413 | 1.82053447 | 5.64566216  | 6.60622909  | 2.811704928   | 4.272836164 | 3.112414603  | 1.799724524  |
| 75986   | Gdf11         | 14561    | 4.82932716 | 2.66074232 | 12.131625   | 11.0184723  | 1.399311795   | 2.425432786 | 3.090772029  | 0.51064207   |
| 15460   | Onecut2       | 225631   | 3.23857869 | 3.65730235 | 11.2113282  | 10.0082755  | 1             | 5.923996548 | 3.077141782  | 1.004077145  |
| 22352   | Wfcd15b       | 192201   | 3.89075463 | 3.27879318 | 11.2401571  | 10.7380439  | 1.326623907   | 2.44250345  | 3.065493336  | 0.525713401  |
| 18710   | Gm1821        | 218963   | 5.5696227  | 4.24605424 | 15.6368716  | 14.2080238  | 14.18462396   | 5.256868695 | 3.040533584  | 1.980657348  |
| 171543  | Abi2          | 329165   | 3.80963188 | 3.80135062 | 11.9881696  | 11.0277358  | 4.007726339   | 4.897182632 | 3.02403867   | 1.17000781   |
| 20907   | Med13         | 327987   | 13.899821  | 14.463512  | 46.1876423  | 39.5133264  | 9.480343283   | 14.07298048 | 3.021540833  | 0.830414527  |
| 24088   | Stx11         | 74732    | 2.60222047 | 2.58951856 | 7.25455439  | 8.3006597   | 2.252901909   | 5.288211214 | 2.996147145  | 1.452521606  |
| 319582  | Tmem236       | 625286   | 1.5540433  | 1.82485807 | 5.20252142  | 4.88804172  | 1.831504251   | 1           | 2.986344392  | 0.837995533  |
| 71296   | Defa2         | 1E+08    | 28.9056378 | 20.1168986 | 73.6978333  | 72.0584643  | 13.530357     | 8.636297849 | 2.97325084   | 0.452172745  |
| 22051   | Entpd8        | 72090    | 7.95525734 | 6.66233085 | 19.9647707  | 23.2848874  | 14.51921652   | 6.662669819 | 2.958741043  | 1.449068483  |
| 14778   | Irgm2         | 54396    | 1.88691986 | 1.52908156 | 5.32601108  | 4.72876976  | 1             | 1           | 2.943436085  | 0.585479851  |
| 117600  | Srgap1        | 117600   | 2.06034609 | 2.14194094 | 6.40913874  | 5.84605904  | 2.229970925   | 1.966474802 | 2.916316207  | 0.99860997   |
| 76453   | Ddx58         | 230073   | 5.79999919 | 5.45272728 | 17.2703809  | 15.4679028  | 5.238428224   | 6.25180942  | 2.909364573  | 1.021106899  |
| 17131   | Gadd45g       | 23882    | 2.95549893 | 1.5990945  | 5.00201887  | 8.15732651  | 2.0602874     | 3.812898165 | 2.889246992  | 1.289508196  |
| 77579   | Nrp2          | 18187    | 1.38877345 | 1.72908735 | 4.59742806  | 4.36322992  | 2.212455748   | 3.388218231 | 2.873976286  | 1.796319448  |
| 67194   | Cdc42ep3      | 260409   | 2.80193871 | 3.12177033 | 8.73334117  | 8.2746902   | 3.037536195   | 4.197752187 | 2.871179401  | 1.221411844  |
| 382073  | Mapk8ip1      | 19099    | 2.57617679 | 2.06066473 | 6.33722395  | 6.95553072  | 3.026674226   | 2.950144663 | 2.866769247  | 1.28898494   |
| 328949  | Slc46a3       | 71706    | 1.19774188 | 1.66435471 | 4.32749454  | 3.814069678 | 1.591347711   | 1           | 2.844615462  | 0.905401906  |
| 11657   | G630055G22Rik | 414127   | 38.1493799 | 35.2726974 | 96.9147265  | 111.725601  | 44.78595298   | 55.84822795 | 2.841656568  | 1.370625631  |
| 29811   | Lect2         | 16841    | 8.73150897 | 7.40352532 | 24.6066849  | 21.1061276  | 12.52000088   | 2.730532825 | 2.833140087  | 0.945491248  |
| 19224   | Rps19-ps3     | 277692   | 1.99808374 | 1.74340511 | 5.04063433  | 5.55789662  | 2.466541395   | 1.933300583 | 2.832704141  | 1.175960201  |
| 381524  | Pycr1         | 209027   | 24.2743036 | 25.7547209 | 73.3538     | 68.2890803  | 4.472115039   | 6.733222782 | 2.831214118  | 0.22397674   |
| 52250   | Nfkbi2        | 80859    | 2.15374926 | 1.97389329 | 5.94550972  | 5.67351057  | 1.617476599   | 5.392392833 | 2.814928896  | 1.698274341  |
| 1E+08   | Fgd2          | 26382    | 1.55697135 | 1          | 3.1162337   | 4.07561451  | 1.350795614   | 1.068371651 | 2.812644656  | 0.946106519  |
| 17161   | Ceacam10      | 26366    | 4.72654372 | 4.00070014 | 12.3143622  | 12.177669   | 1             | 9.169746178 | 2.806387855  | 1.165287271  |
| 74182   | Bmf           | 171543   | 3.14141991 | 2.85138115 | 8.45923558  | 8.28840672  | 1.290082564   | 3.008041769 | 2.794626775  | 1.0717214586 |
| 1414127 | Vipr1         | 22354    | 5.34377254 | 4.84969494 | 14.6504391  | 13.6907701  | 5.985003953   | 4.273490751 | 2.78033057   | 0.766379304  |
| 102294  | Rarb          | 218772   | 2.31575078 | 2.12230455 | 6.26164015  | 6.05159442  | 4.274359937   | 2.884260557 | 2.77446621   | 1.613008391  |
| 20349   | Gstm7         | 68312    | 24.182123  | 21.3536161 | 68.3108103  | 57.9240672  | 5.778277137   | 10.65590337 | 2.772215405  | 0.360907297  |
| 56847   | Lypd6         | 320343   | 6.18619796 | 5.84878193 | 18.1505455  | 15.2127461  | 1             | 1           | 2.772193382  | 0.166182247  |
| 74732   | Zfp945        | 240041   | 1.60449018 | 1.3778168  | 4.15998867  | 4.04021061  | 1.542050487   | 1.206172359 | 2.749616102  | 0.921509043  |
| 67937   | Extl1         | 56219    | 4.11010429 | 3.70427062 | 9.95984299  | 11.5006484  | 1.091742031   | 1.344873082 | 2.746283827  | 0.311811903  |
| 209027  | Utp14b        | 195434   | 4.93713878 | 5.86021624 | 15.4243277  | 14.0592848  | 3.805791959   | 7.087333806 | 2.730632864  | 1.008869834  |
| 73747   | Tmcc3         | 319880   | 5.40210357 | 5.27691228 | 14.6210498  | 14.5130195  | 8.83030335    | 11.85332004 | 2.728160507  | 1.936847135  |
| 107373  | Tsyp12        | 52808    | 3.95415384 | 3.72358683 | 10.14526005 | 10.793142   | 2.202053316   | 5.118970882 | 2.72715677   | 0.953538875  |
| 14621   | Ccdc112       | 240261   | 1.4623687  | 1.99498894 | 4.84809712  | 4.53286282  | 2.728276002   | 3.573091106 | 2.713332232  | 1.822596258  |
| 17752   | Vnn1          | 22361    | 5.04685627 | 7.76602149 | 18.1780432  | 16.5550516  | 2.046643181   | 3.924585799 | 2.710795763  | 0.4660334    |
| 244853  | Dnaj4         | 58233    | 4.41718054 | 4.26425141 | 11.7149655  | 11.6691454  | 1.473088595   | 2.247440622 | 2.693577626  | 0.428561698  |
| 20913   | 2700081O15Rik | 108899   | 2.57019585 | 2.04383226 | 5.88915645  | 6.52805132  | 1.319279094   | 2.2145941   | 2.691185978  | 0.765897629  |
| 18164   | Pnllpr2       | 18947    | 20.6146062 | 19.893486  | 61.7121477  | 47.1256953  | 1             | 11.81130444 | 2.686817302  | 0.316265312  |
| 319909  | Adams17       | 233332   | 5.00099305 | 4.60295009 | 13.513074   | 12.2772931  | 1.615007092   | 1.506710298 | 2.685393563  | 0.325045384  |
| 67216   | Ptprc         | 19267    | 7.23905812 | 6.57482867 | 19.3976638  | 17.53297    | 4.775386157   | 7.107802526 | 2.673442626  | 0.860234984  |
| 12945   | Bmp2          | 12156    | 1.70067504 | 1.8396473  | 5.10483348  | 4.35241282  | 1.179647679   | 4.425037557 | 2.671295261  | 1.583100265  |
| 228608  | 9230110C19Rik | 234912   | 2.80698159 | 2.29016001 | 7.05642522  | 6.55763044  | 4.218929559   | 2.825406407 | 2.670919653  | 1.382016927  |
| 240261  | Fam46a        | 212943   | 8.68964958 | 7.02962485 | 20.7289863  | 20.8989811  | 5.471644123   | 12.05440553 | 2.648206033  | 1.114940115  |
| 67855   | Smad7         | 17131    | 2.94728791 | 2.80306539 | 7.36900432  | 7.83390971  | 1.165053011   | 2.486106672 | 2.6443822602 | 0.634945279  |
| 12156   | Ccdc84        | 382073   | 2.13341052 | 1.47455813 | 4.41775986  | 5.08846989  | 2.20812983    | 1.957756041 | 2.634787237  | 1.15463472   |
| 11982   | Gulo          | 268756   | 8.10785057 | 8.21842535 | 23.1941553  | 19.7174859  | 1.728276564   | 2.088450428 | 2.628379271  | 0.233778175  |
| 52668   | Ldlrad3       | 241576   | 3.08964975 | 2.92418077 | 8.28817233  | 7.43436541  | 2.453392911   | 2.597062799 | 2.614396545  | 0.839806791  |
| 18576   | Ada           | 11486    | 6.45349818 | 6.73193012 | 17.7100367  | 16.5552857  | 12.86094724   | 10.55879431 | 2.598726536  | 1.776183604  |
| 380694  | Fgfbb3        | 72514    | 1.69655048 | 1.37204004 | 3.62990955  | 4.3146502   | 2.06498056    | 1.635531108 | 2.588993122  | 1.205932054  |
| 382245  | Ccnj1         | 380694   | 2.46881494 | 1.99487817 | 5.82846265  | 5.72215707  | 3.284740045   | 3.105993047 | 2.587682315  | 1.431714263  |
| 226841  | Grik5         | 14809    | 1.84536955 | 1.66132496 | 4.07830084  | 4.98416904  | 1             | 1.51972295  | 2.584334002  | 0.718546465  |
| 239673  | Fermt2        | 218952   | 4.79076252 | 5.20704184 | 14.0538237  | 11.7356797  | 1             | 4.590780011 | 2.579516711  | 0.559200781  |
| 74076   | Cd200         | 17470    | 1.51926781 | 1.34423412 | 4.09371197  | 3.28548897  | 1             | 1           | 2.576984802  | 0.698445488  |
| 114606  | Alb           | 11657    | 3.44764828 | 5.07201777 | 13.4203398  | 8.50590063  | 1             | 1.085338713 | 2.573603279  | 0.244767659  |
| 382083  | Tlr2          | 24088    | 3.77144399 | 3.07683291 | 8.38418761  | 9.20335067  | 5.325717118   | 5.917364642 | 2.568169853  | 1.641738779  |
| 328957  | Tgfb2         | 21808    | 3.80413066 | 4.01907333 | 10.9518091  | 9.06822068  | 1             | 1           | 2.55905762   | 0.255649732  |
| 241576  | Sectm1a       | 209588   | 1.62726284 | 1.70600875 | 5.05858047  | 3.79057996  | 2.597365421   | 1.273593555 | 2.532395033  | 1.161309201  |
| 240041  | Bex4          | 406217   | 10.5323729 | 7.14375102 | 21.342743   | 23.1273009  | 2.816348175   | 15.71909005 | 2.515825535  | 1.048614409  |
| 1E+08   | Cetn2         | 26370    | 29.7842763 | 29.4682197 | 76.2954808  | 72.3724146  | 49.99123628   | 32.57691311 | 2.509057092  | 1.39349656   |
| 229927  | Pcgf1         | 69837    | 5.66997864 | 5.58169696 | 14.83985    | 13.2055327  | 7.311400089   | 6.532134966 | 2.492551661  | 1.230353198  |
| 76263   | Smox          | 228608   | 14.3422851 | 14.4400477 | 32.6685926  | 39.0305801  | 15.80904923   | 25.67788727 | 2.491082749  | 1.441402849  |
| 70355   | Atxn7i2       | 72522    | 1.89403199 | 1.50119808 | 3.77596921  | 4.6741392   | 3.783920558   | 2.594988239 | 2.488817615  | 1.878785431  |
| 72022   | Hist3h2a      | 319162   | 2.8764875  | 1.8053428  | 5.43500627  | 6.20899728  | 3.769151801   | 2.626434125 | 2.487062286  | 1.366043945  |
| 12578   | Pmp22         | 18858    | 1.85502252 | 2.72287037 | 6.01791613  | 5.33192985  | 6.268947292   | 1.711920256 | 2.479272945  | 1.743349559  |
| 76260   | Ptpro         | 19277    | 8.05546014 | 6.91268555 | 18.5570696  | 18.3425651  | 13.54351021   | 6.900737716 | 2.465210817  | 1.36558041   |
| 233332  | Clk4          | 12750    | 8.22702598 | 8.69527467 | 20.9954092  | 20.6742917  | 7.787916414   | 10.16238203 | 2.46241346   | 1.060748111  |
| 20311   | Nkd1          | 93960    | 57.5229596 | 50.7271147 | 129.351682  | 136.996289  | 11.84820416   | 18.33891651 | 2.460487644  | 0.278864665  |
| 19099   | Gm20559       | 330256   | 10.8532333 | 9.93352457 | 26.7681031  | 24.2743877  | 6.553058905   | 11.78494973 | 2.455529188  | 0.882196672  |
| 56219   | Slc35f2       | 72022    | 5.77655876 | 6.04902658 | 14.8256248  | 14.1795761  | 6.975955321   | 5.128336754 | 2.4527497    | 1.023568113  |
| 18947   | Ttc8          | 76260    | 1.49132273 | 1.69941892 | 4.29814603  | 3.47644123  | 1             | 2.344436982 | 2.436608198  | 1.048169156  |
| 14174   | Trim12c       | 319236   | 2.00289737 | 2.10045765 | 5.07861532  | 4.89209019  | 1.113966942   | 1.133318183 | 2.429891014  | 0.547670165  |
| 319162  | Pglrpp1       | 21946    | 168.424826 | 161.208835 | 372.190133  | 428.367435  | 240.0037271   | 183.2980973 | 2.428268091  | 1.284158369  |
| 74050   | LOC100862126  | 1.01E+08 | 9.79703911 | 7.65243189 | 21.2325038  | 20.7981457  | 3.416813255</ |             |              |              |

|        |               |        |            |            |            |             |             |              |             |             |
|--------|---------------|--------|------------|------------|------------|-------------|-------------|--------------|-------------|-------------|
| 192216 | Tcf12         | 21406  | 39.5945511 | 37.9044414 | 96.0417642 | 85.6622698  | 22.47248872 | 28.63427161  | 2.344598659 | 0.659450641 |
| 58194  | Reep1         | 52250  | 2.38618202 | 2.31789417 | 5.43811138 | 5.58301333  | 1.203958505 | 2.368016117  | 2.342888219 | 0.759336046 |
| 286942 | Slc23a2       | 54338  | 4.68811513 | 5.02772764 | 11.9638739 | 10.7490663  | 2.954352762 | 4.423913877  | 2.337721739 | 0.759405726 |
| 20897  | Nts           | 67405  | 6.11337048 | 6.6493407  | 15.0560686 | 14.7640661  | 5.063417692 | 3.006572817  | 2.336504705 | 0.632310047 |
| 20249  | Myh10         | 77579  | 5.45882974 | 4.90790832 | 12.5843186 | 11.496994   | 10.7827346  | 7.578531905  | 2.322940206 | 1.771171066 |
| 217682 | Rundc3a       | 51799  | 1.60720769 | 1.64383162 | 3.33857743 | 4.21187611  | 2.499958594 | 1.902919062  | 2.322473775 | 1.354298499 |
| 209773 | Nox1          | 237038 | 11.5817319 | 8.55132809 | 27.9421998 | 27.9421998  | 18.6623143  | 3.4839575138 | 2.314825176 | 0.33218493  |
| 71706  | Pik3r3        | 18710  | 14.2135261 | 13.9760348 | 34.3114312 | 30.7264247  | 11.52427031 | 11.97676355  | 2.307161012 | 0.833678607 |
| 12583  | LOC671650     | 671650 | 5.16598803 | 4.50562424 | 8.78542026 | 13.5196163  | 6.349313001 | 4.8079037    | 2.30623767  | 1.153604631 |
| 14026  | Lrrc45        | 217366 | 21.5706688 | 21.6348918 | 47.3886514 | 52.0593719  | 12.18525046 | 15.38021856  | 2.301741304 | 0.638007439 |
| 16391  | Gjb4          | 14621  | 3.1514411  | 2.74446644 | 7.25807266 | 6.23400538  | 4.804960929 | 4.574261045  | 2.288380192 | 1.590802078 |
| 16145  | Pde3b         | 18576  | 5.7216161  | 5.20019347 | 12.6975953 | 12.2749199  | 2.447711967 | 5.555053092  | 2.286481469 | 0.732732521 |
| 13139  | Ppap2b        | 67916  | 3.43414368 | 3.45408432 | 8.15275918 | 7.59374419  | 1           | 2.878457478  | 2.286002058 | 0.563055591 |
| 71897  | Irf9          | 16391  | 3.76552468 | 3.91732221 | 8.5038279  | 9.03890744  | 1.389805928 | 3.424782099  | 2.283363913 | 0.626667184 |
| 75723  | Smpd1         | 20597  | 2.46784588 | 2.63241199 | 5.50010629 | 6.14476399  | 6.019719235 | 3.942541387  | 2.283192452 | 1.95328567  |
| 58233  | Usp11         | 236733 | 2.59638909 | 1.97689329 | 5.38329841 | 4.96943385  | 1.91259459  | 2.527502116  | 2.263742186 | 0.970877443 |
| 14268  | Arl6          | 56297  | 4.61466622 | 4.35679853 | 10.4571536 | 9.79818003  | 9.734822677 | 4.828076716  | 2.257751012 | 1.623246572 |
| 1E+08  | 1110034G24Rik | 73747  | 2.84450299 | 3.13507987 | 6.80543933 | 6.68734663  | 2.137663101 | 1.841572379  | 2.256476122 | 0.665470413 |
| 11861  | Papp2         | 23972  | 10.2950384 | 12.390597  | 27.1822693 | 24.0061975  | 3.158817964 | 10.31401898  | 2.256426411 | 0.593892862 |
| 14465  | Fn1           | 14268  | 6.01117658 | 6.30225575 | 15.749169  | 12.0040073  | 3.110805296 | 17.20735324  | 2.256426411 | 1.650080822 |
| 545428 | DOH4S114      | 27528  | 2.16564039 | 1.98152793 | 4.71355545 | 4.62976254  | 1.793835305 | 1.143862602  | 2.252939181 | 0.708362353 |
| 1E+08  | Arhgap42      | 71544  | 12.8626233 | 14.6067489 | 32.0867997 | 29.7617138  | 12.90394867 | 9.950450885  | 2.251544488 | 0.831995701 |
| 319236 | Gata6         | 14465  | 6.85455543 | 6.41011216 | 14.9605883 | 14.8474256  | 8.760278284 | 7.777380377  | 2.247173831 | 1.24674505  |
| 21406  | Msi1          | 17690  | 3.26005793 | 2.65730919 | 5.9693796  | 7.2336771   | 4.834523829 | 2.997666318  | 2.231238395 | 1.323593753 |
| 1E+08  | Cik1          | 12747  | 19.5980607 | 18.4582132 | 43.0344463 | 41.441577   | 16.92678412 | 20.37882548  | 2.219766006 | 0.980274885 |
| 14561  | Zswim5        | 74464  | 2.87434174 | 2.79305716 | 6.51252182 | 6.01937292  | 2.195044214 | 1.909465429  | 2.211225105 | 0.724231647 |
| 329165 | Cyp27a1       | 104086 | 8.71450005 | 9.44227172 | 20.8093558 | 19.3214371  | 6.464290352 | 6.860425697  | 2.210238331 | 0.733870328 |
| 14618  | Arl3          | 56350  | 11.9960389 | 11.5425142 | 25.0811397 | 26.9281796  | 26.81888401 | 12.61402681  | 2.209537652 | 1.675247867 |
| 75957  | Cblb          | 208650 | 2.35995328 | 2.14891765 | 4.80939693 | 5.13589604  | 2.451087352 | 5.128333199  | 2.205716933 | 1.681001887 |
| 26366  | Gprc5c        | 70355  | 3.31582668 | 2.34798534 | 6.458768   | 5.96347519  | 1           | 3.658966229  | 2.193265444 | 0.822584897 |
| 17229  | Efcab4b       | 381812 | 4.49458496 | 3.99530073 | 8.92560338 | 9.62325861  | 1.073458792 | 3.47455881   | 2.184818815 | 0.535698332 |
| 225631 | Gjb1          | 14618  | 3.6841002  | 3.9336012  | 7.75098575 | 8.8776375   | 1           | 4.460667769  | 2.1828925   | 0.716839304 |
| 13370  | Mir17hg       | 75957  | 5.55692319 | 4.74098885 | 10.9659409 | 11.5121293  | 1.725405847 | 4.747973227  | 2.182779397 | 0.628610834 |
| 30946  | Pea15a        | 18611  | 25.9186559 | 24.3941651 | 57.1515016 | 52.6167414  | 22.01687794 | 39.12338787  | 2.181715136 | 1.2152025   |
| 215707 | Scd1          | 20249  | 82.4858644 | 86.4182613 | 189.476091 | 178.192462  | 86.94848591 | 185.3763     | 2.176788467 | 1.612303932 |
| 245386 | Afm           | 280662 | 5.53466501 | 6.77539238 | 14.3906914 | 12.3752717  | 1           | 1            | 2.174316679 | 0.162468779 |
| 12841  | 8430419L09Rik | 74525  | 2.77559909 | 2.3504549  | 5.59040189 | 5.54413274  | 1           | 1.876450197  | 2.172145405 | 0.561143172 |
| 20597  | Fam89a        | 69627  | 2.99370673 | 1.97809395 | 5.70668013 | 5.09166111  | 5.593328255 | 1.991316526  | 2.171917566 | 1.525532752 |
| 72514  | Amt           | 434437 | 19.1374977 | 16.6815958 | 40.3304193 | 37.3847894  | 12.36172868 | 23.77919548  | 2.169658724 | 1.008984891 |
| 103149 | Ilf17rd       | 171463 | 2.6152584  | 2.74852862 | 5.99438688 | 5.6344848   | 1           | 1.92298872   | 2.168033824 | 0.544948692 |
| 14809  | Hist2h2be     | 319190 | 4.64932249 | 4.1290589  | 9.64394418 | 9.32982616  | 5.453702488 | 3.4120479    | 2.161420138 | 1.009952745 |
| 320007 | Znrf3         | 407821 | 11.6022073 | 10.9370109 | 25.0686257 | 23.5842448  | 5.733176921 | 9.819895691  | 2.158587308 | 0.6900449   |
| 14186  | Amot1         | 75723  | 6.92136314 | 7.11515951 | 15.5586678 | 14.6733838  | 2.018873058 | 10.55275144  | 2.153812757 | 0.895636677 |
| 68891  | Npy           | 109648 | 40.0684084 | 44.911447  | 91.7129784 | 91.1373616  | 1           | 4.84348341   | 2.15169041  | 0.06876316  |
| 17427  | H2-Q4         | 15015  | 8.8892426  | 7.4919704  | 17.2035262 | 17.963986   | 7.520681499 | 12.38435648  | 2.14681979  | 1.215113801 |
| 56350  | 201011101Rik  | 72061  | 3.32666041 | 3.10559651 | 6.98801158 | 6.81972895  | 5.956975395 | 4.385970778  | 2.146640086 | 1.607980887 |
| 11486  | Zfp566        | 72556  | 2.33253819 | 2.67643868 | 5.54453972 | 5.18249996  | 2.812326899 | 2.161847115  | 2.14156303  | 0.993051904 |
| 21809  | Ephb6         | 13848  | 1.60253432 | 1.89974674 | 3.48781568 | 4.00798331  | 1.384118679 | 1.281938899  | 2.140261982 | 0.761234618 |
| 77976  | Muc6          | 353328 | 9.17059029 | 7.87518601 | 16.5808987 | 19.8646711  | 1           | 8.961394187  | 2.138099735 | 0.584390761 |
| 280662 | Ctxn1         | 330695 | 8.83467461 | 7.04331985 | 15.9292176 | 18.0006812  | 15.62868082 | 10.3520989   | 2.136913379 | 1.636271329 |
| 12747  | Tnfrsf11b     | 18383  | 17.2773925 | 19.4902582 | 39.5935165 | 38.6724162  | 37.30158425 | 20.71292508  | 2.128662862 | 1.577868266 |
| 195434 | Stxbp1        | 20910  | 2.68305086 | 2.41759939 | 5.43998171 | 5.39452862  | 1.15954578  | 3.379219348  | 2.124142964 | 0.889840493 |
| 406217 | Peli1         | 67245  | 4.19949049 | 4.30303329 | 9.30484746 | 8.74937219  | 5.34388292  | 3.971686637  | 2.123393573 | 1.095624053 |
| 69837  | Sectm1b       | 58210  | 10.8414093 | 8.29159988 | 21.8731971 | 18.74288331 | 12.49304283 | 8.512518332  | 2.122827623 | 1.09787023  |
| 16419  | Dtx3          | 80904  | 4.93903195 | 4.04193914 | 8.61938359 | 10.3603483  | 1.14246082  | 3.704013097  | 2.113327357 | 0.539638071 |
| 667373 | Nrbp2         | 223649 | 3.17962296 | 3.25725688 | 6.5908713  | 6.98949247  | 1           | 2.218381361  | 2.109774319 | 0.499990903 |
| 17470  | Mem3b         | 108797 | 2.89043614 | 2.3405948  | 5.3729075  | 5.63084875  | 2.882954764 | 2.38623826   | 2.103554035 | 1.007295327 |
| 68797  | Sh3d21        | 66938  | 3.05432779 | 2.65755638 | 5.80857188 | 6.20426281  | 1.551917322 | 1.933242344  | 2.103129953 | 0.610159373 |
| 434437 | Lypd8         | 70163  | 37.7641654 | 40.2840967 | 80.4631325 | 82.7166412  | 105.9523664 | 24.64354672  | 2.090754737 | 1.67327125  |
| 12750  | Pdgfa         | 18590  | 13.4239561 | 8.95414512 | 21.2241901 | 25.3984051  | 13.57097999 | 11.74387001  | 2.083402641 | 1.131233152 |
| 72556  | Hebp2         | 56016  | 4.10911811 | 3.0063936  | 7.35286909 | 7.46752416  | 3.66282278  | 9.674226395  | 2.082828875 | 1.87436262  |
| 268903 | Ezr2          | 242705 | 3.26963728 | 3.0870377  | 6.64072244 | 6.59627845  | 3.365687196 | 4.457069014  | 2.082378118 | 1.230636494 |
| 29867  | Gpc1          | 14733  | 10.9333477 | 11.2068677 | 22.6700866 | 23.3920355  | 7.71447725  | 11.92026166  | 2.080473083 | 0.886835949 |
| 260409 | Efemp2        | 58859  | 3.39156466 | 3.24101635 | 6.629390   | 7.16211856  | 1.406744575 | 3.455855991  | 2.079345509 | 0.73313851  |
| 27528  | Atp6v0e2      | 76252  | 10.3381232 | 9.11443104 | 20.8561361 | 19.4871202  | 19.23234798 | 10.0061009   | 2.073931051 | 1.503064763 |
| 51799  | Cpne2         | 234577 | 3.30496593 | 2.96808478 | 6.21262856 | 6.79562385  | 3.450791243 | 4.854999005  | 2.073672447 | 1.324043218 |
| 209588 | Rnf24         | 51902  | 2.10649764 | 2.02226099 | 4.42591732 | 4.13000835  | 1.426426094 | 2.97710045   | 2.072275578 | 1.06549765  |
| 268756 | Atp8b2        | 54667  | 2.2347174  | 1.94708194 | 4.27478363 | 4.35368793  | 1           | 2.94672106   | 2.063339453 | 0.943785376 |
| 241275 | Csrmp2        | 207785 | 2.44462589 | 2.18586833 | 4.37712323 | 5.1352019   | 2.65650237  | 2.144515435  | 2.054278589 | 1.036826218 |
| 26370  | Sh3bp2        | 24055  | 2.7038777  | 2.4339464  | 4.94770471 | 5.60434784  | 2.473157639 | 2.972183522  | 2.053797936 | 1.059853558 |
| 68511  | Gramd3        | 107022 | 3.47146758 | 3.04450419 | 6.41952477 | 6.95150618  | 8.395475277 | 4.274754594  | 2.05203942  | 1.944488144 |
| 66793  | Gm8979        | 668108 | 24.6539414 | 24.9969644 | 53.841459  | 47.9496507  | 4.496706742 | 2.148520437  | 2.050136008 | 1.133838992 |
| 19054  | Iff80         | 68259  | 4.10141293 | 4.14271738 | 8.47141637 | 8.42524711  | 5.030036957 | 4.988722082  | 2.049538625 | 1.215259666 |
| 1E+08  | Slc16a10      | 72472  | 9.61736184 | 9.48496862 | 20.8130357 | 18.3202261  | 4.192225728 | 2.703584597  | 2.048611913 | 0.360993144 |
| 21886  | Sntb1         | 20649  | 8.61858006 | 7.8035993  | 17.9629326 | 15.6720717  | 1.808612701 | 7.091509242  | 2.048144989 | 0.541957419 |
| 18611  | Myb           | 17863  | 13.8592069 | 11.8530826 | 25.767531  | 26.822288   | 2.23528051  | 17.86213468  | 2.045318401 | 1.559464984 |
| 19267  | Arl5b         | 75869  | 7.77563501 | 7.6887347  | 15.5346949 | 16.0858136  | 4.408828016 | 9.35382281   | 2.044733089 | 0.88995873  |
| 67709  | Plekhh1       | 27276  | 2.09274626 | 2.23492141 | 4.54789675 | 4.24129843  | 1           | 1.053307533  | 2.030931173 | 0.474460538 |
| 69453  | Mapk4         | 225724 | 3.53389065 | 3.19536536 | 6.95105953 | 6.71139979  | 1           | 1            | 2.030707554 | 0.297209676 |
| 319880 | Tmem56        | 99887  | 6.21460458 | 6.314047   | 13.2754513 |             |             |              |             |             |
