# Supplementary material for: Intestinal cancer progression by mutant p53 through the acquisition of invasiveness associated with complex glandular formation
Source: PubMed Central journal article supplement (PMC5658682; doi:10.1038/onc.2017.194), 2017-06-19
Supplement: onc2017194x9.pdf [file onc2017194x9.pdf]

Supplementary Table 2. Clinicopathological information of human CRC samples

| Case No. | TP53 gene | Age | Gender | Tumor site(primary) | Materials                | pStage | Genetic alteration (ex. driver gene)                      | Trial name |
|----------|-----------|-----|--------|---------------------|--------------------------|--------|-----------------------------------------------------------|------------|
| 1        | Wild      | 50  | F      | Rs                  | Primary tumor            | IV     | APC Q541fs, APC Q1294fs, FBXW7 S582L, ERBB2 Amplification | GI-SCREEN  |
| 2        | Wild      | 66  | M      | Rb                  | Primary tumor            | IIIB   | KRAS G12V, APC E1309fs                                    | GI-SCREEN  |
| 3        | Wild      | 60  | M      | Rb                  | Lymph node               | IIIC   | KRAS G161L, SMAD4 R361S                                   | GI-SCREEN  |
| 4        | R273H     | 65  | F      | Sigmoid colon       | Primary tumor            | IIIC   | -                                                         | GI-SCREEN  |
| 5        | R273H     | 66  | F      | Rb                  | Metastatic tumor (Liver) | IV     | APC K993fs, APC E1309fs, WT1 R434H                        | GI-SCREEN  |
| 6        | R273C     | 43  | M      | Rectum (Ra, Rb)     | Metastatic tumor (Liver) | IV     | APC N933fs, TSC2 V339fs                                   | BREAC      |
| 7        | R273C     | 73  | F      | Sigmoid colon       | Primary tumor            | IV     | APC K226fs, PIK3CA F83I                                   | BREAC      |
| 8        | P278S     | 70  | M      | Sigmoid colon       | Primary tumor            | IV     | AR L55Q, BRCA2 S3041L, GNAS E481D, PIK3CA G460R           | BREAC      |
| 9        | V272M     | 64  | F      | Sigmoid colon       | Primary tumor            | IV     | FLT3 P211T, TSC1 G965S, TSC1 G1016S                       | BREAC      |
